# Supplementary material for: Effector-Memory B-Lymphocytes and Follicular Helper T-Lymphocytes as Central Players in the Immune Response in Vaccinated and Nonvaccinated Populations against SARS-CoV-2
Source: MDPI journal article supplement (doi:10.3390/vaccines10101761), 2022-10-20
Supplement: s1 [file s1]

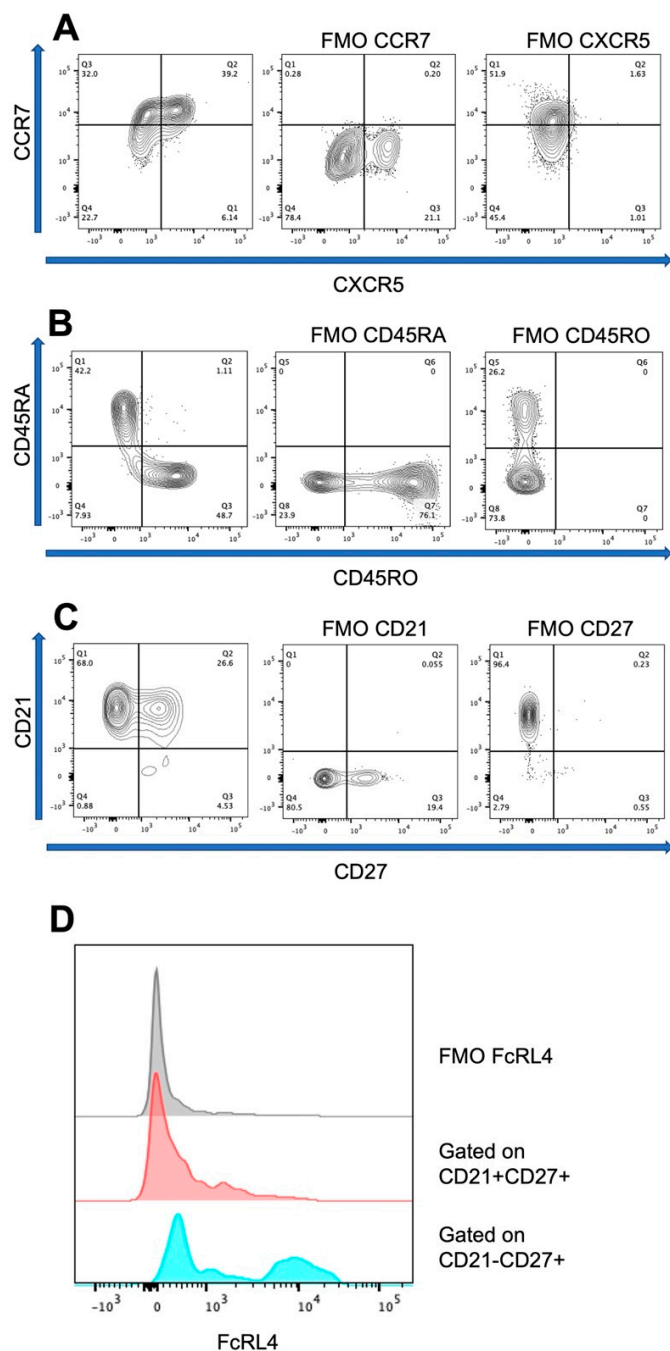

**Figure S1:** FMO controls. A. CCR7 vs CXCR5 dot plot from CD3+CD4+ lymphocytes. FMO for CCR7 and CXCR5 are shown. B. CD45RA vs CD45RO dot plot from CD3+CD4+ lymphocytes. FMO control for CD45RA and CD45RO are shown. C. CD21 vs CD27 dot plot from CD19+ lymphocytes. FMO control for CD21 and CD27. D. FcRL4 histogram gated on CD21+CD27+ and gated on CD21-CD27+ lymphocytes. FMO FcRL4 is shown.

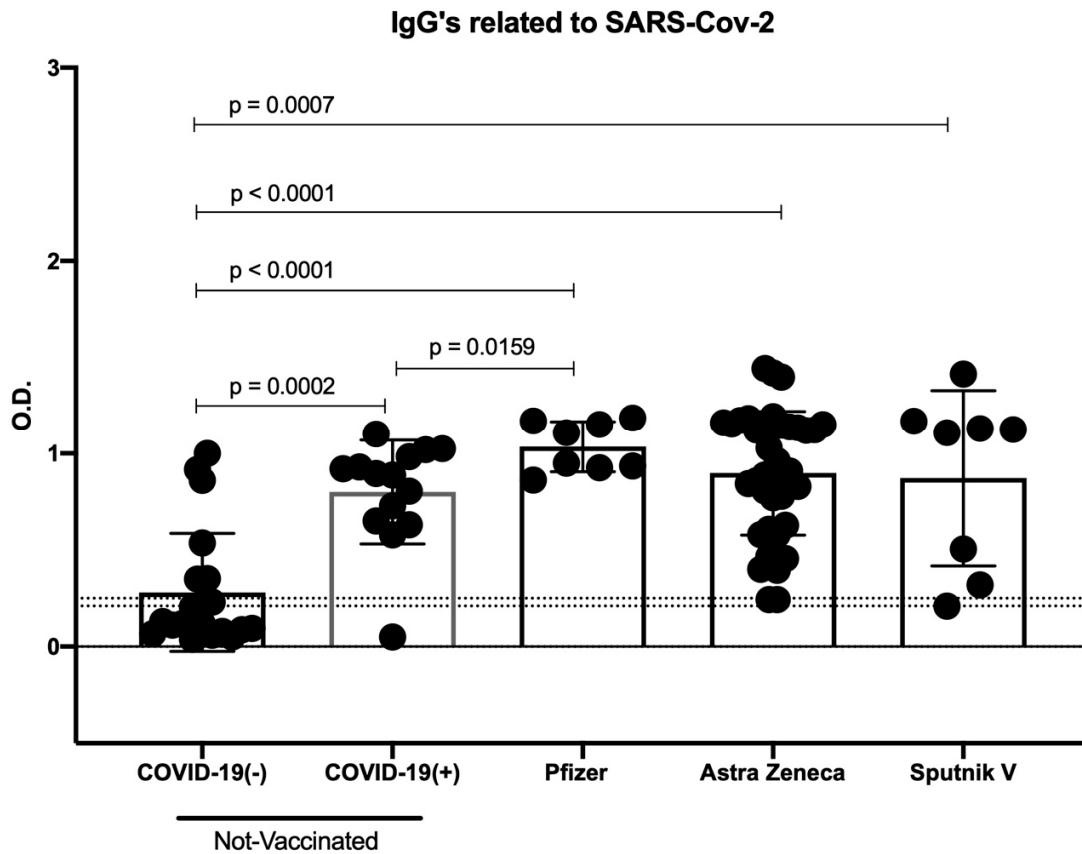

**Figure S2:** OD of IgG's related to SARS-CoV-2 against RBD domain of S protein induced by distinct vaccine platforms. Samples from non-vaccinated subject with and without history of COVID-19 ( $n = 14$ , and  $n = 20$ , respectively), and samples from subjects vaccinated with Pfizer ( $n = 8$ ), vaccinated with Astra Zeneca ( $n = 38$ ), and vaccinated with Sputnik V ( $n = 8$ ). Cut-off values are indicated by lines. The mean  $\pm$  standard deviation of the mean (SD) is shown.
