# Supplementary material for: Effector-Memory B-Lymphocytes and Follicular Helper T-Lymphocytes as Central Players in the Immune Response in Vaccinated and Nonvaccinated Populations against SARS-CoV-2
Source: Vaccines (Basel). 2022 Oct 20;10(10):1761. doi: 10.3390/vaccines10101761 (PMC9607383; doi:10.3390/vaccines10101761)
Supplement: Supplementary file 1 [file vaccines-10-01761-s001.zip › Supplementary Tables.xlsx]

## Sheet: TableS1 O.D. Age stratification
		No-vaccinated			Pfizer			Astra Zeneca			Sputnik V
		<30 years	>30 years		<30 years	>30 years		<30 years	>30 years		<30 years	>30 years
	Number of values	13	21		4	4		11	27		3	5
	Minimum	0.03821	0.04967		0.8621	0.9496		0.3949	0.2429		0.505	0.2088
	25% Percentile	0.1064	0.0993		0.8779	1		0.8199	0.5798		0.505	0.2641
	Median	0.6302	0.2296		0.9298	1.161		1.029	0.8882		1.109	1.13
	75% Percentile	0.9254	0.8919		1.065	1.182		1.194	1.139		1.126	1.292
	Maximum	1.025	1.103		1.109	1.185		1.444	1.42		1.126	1.415
	Range	0.9865	1.053		0.247	0.2358		1.049	1.177		0.6213	1.206
	Mean	0.5694	0.4482		0.9577	1.114		0.99	0.8603		0.9134	0.8484
	Std. Deviation	0.3893	0.3874		0.1059	0.1106		0.3202	0.3205		0.3538	0.5459
	Std. Error of Mean	0.108	0.08454		0.05297	0.05532		0.09653	0.06169		0.2043	0.2441
	P	0.506			0.0571			0.2784			0.7857
		No-vaccinated					Vaccinated 1st dose					Vaccinated 2nd dose
		COVID 19(-)		COVID 19(+)			COVID 19(-)		COVID 19(+)			COVID 19(-)		COVID 19(+)
		<30 years	>30 years	<30 years	>30 years		<30 years	>30 years	<30 years	>30 years		<30 years	>30 years	<30 years	>30 years
	Number of values	6	14	7	7		12	22	7	14		10	18	4	12
	Minimum	0.03821	0.04967	0.05009	0.6497		0.3949	0.2088	0.8286	1.12		0.8049	0.814	1.032	1.022
	25% Percentile	0.07977	0.0757	0.5777	0.7277		0.5373	0.441	1.109	1.13		0.9563	0.9916	1.049	1.11
	Median	0.2357	0.1233	0.8042	0.8954		0.8602	0.7736	1.126	1.153		1.058	1.099	1.188	1.305
	75% Percentile	0.896	0.2594	0.9301	1.019		1.005	0.9191	1.399	1.184		1.19	1.306	1.383	1.387
	Maximum	1.001	0.9167	1.025	1.103		1.194	1.169	1.444	1.42		1.386	1.377	1.419	1.463
	Mean	0.4109	0.2246	0.7054	0.8952		0.815	0.696	1.17	1.187		1.075	1.12	1.207	1.258
	Std. Deviation	0.4192	0.2399	0.3317	0.1605		0.2554	0.3041	0.2054	0.09996		0.177	0.1651	0.1751	0.1508
	Std. Error of Mean	0.1711	0.06412	0.1254	0.06067		0.07373	0.06482	0.07763	0.02672		0.05599	0.03892	0.08757	0.04354
	P	0.494		0.3176			0.2455		0.443			0.5876		0.7703

## Sheet: TableS2 O.D.
	O.D. per vaccine plattform 1st Dose
		Non-vaccined	Pfizer	Astra Zeneca	Sputnik V
	Number of values	34	8	38	8
	Minimum	0.03821	0.8621	0.2429	0.2088
	25% Percentile	0.1066	0.9275	0.6223	0.3657
	Median	0.4441	1.029	0.8986	1.118
	75% Percentile	0.9007	1.166	1.148	1.159
	Maximum	1.103	1.185	1.444	1.415
	Range	1.064	0.3232	1.201	1.206
	Mean	0.4945	1.036	0.8979	0.8728
	Std. Deviation	0.3868	0.1306	0.3216	0.4552
	Std. Error of Mean	0.06634	0.04618	0.05218	0.1609
	O.D. according COVID-19 history and vaccine schedule
		Non-Vaccinated		Vaccinated 1st dose		Vaccinated 2nd dose
		COVID 19 (-)	COVID 19 (+)	COVID 19 (-)	COVID 19 (+)	COVID 19 (-)	COVID 19 (+)
	Number of values	20	14	34	21	28	16
	Minimum	0.03821	0.05009	0.2088	0.8286	0.8049	1.022
	25% Percentile	0.0809	0.6448	0.4951	1.124	0.9923	1.098
	Median	0.124	0.8919	0.8126	1.152	1.081	1.271
	75% Percentile	0.3514	0.9925	0.9382	1.185	1.264	1.387
	Maximum	1.001	1.103	1.194	1.444	1.386	1.463
	Mean	0.2805	0.8003	0.738	1.181	1.104	1.245
	Std. Deviation	0.3054	0.269	0.2897	0.1386	0.1676	0.1528
	Std. Error of Mean	0.0683	0.07189	0.04968	0.03025	0.03167	0.0382

## Sheet: TableS3 TLC, ANC, and NLR
	Neutrophils
		Non-Vaccinated		Vaccinated 1st dose		Vaccinated 2nd dose
		COVID 19 (-)	COVID 19 (+)	COVID 19 (-)	COVID 19 (+)	COVID 19 (-)	COVID 19 (+)
	Number of values	16	12	29	18	26	14
	Minimum	0.99	1.08	1.61	0.87	0.091	2.21
	25% Percentile	2.83	2.5	2.935	2.678	3.013	2.523
	Median	3.55	3.3	3.88	3.1	3.64	3.25
	75% Percentile	4.265	4.775	4.625	3.585	4.35	4.145
	Maximum	5.87	5.75	7.242	5.264	5.888	5.46
	Mean	3.501	3.422	3.92	3.084	3.563	3.455
	Std. Deviation	1.208	1.483	1.447	0.9903	1.231	1.071
	Std. Error of Mean	0.3021	0.428	0.2687	0.2334	0.2415	0.2863
	Lymphocytes
		Non-Vaccinated		Vaccinated 1st dose		Vaccinated 2nd dose
		COVID 19 (-)	COVID 19 (+)	COVID 19 (-)	COVID 19 (+)	COVID 19 (-)	COVID 19 (+)
	Number of values	16	12	29	18	24	15
	Minimum	1.6	1.05	0.92	1.46	1.01	1.04
	25% Percentile	2.003	1.673	1.875	1.875	1.563	1.59
	Median	2.272	2.18	2.15	2.26	1.68	1.71
	75% Percentile	3.48	2.628	2.44	2.593	2.06	2.51
	Maximum	3.792	3.13	3.26	4.816	2.838	2.816
	Mean	2.546	2.162	2.09	2.388	1.804	1.888
	Std. Deviation	0.7436	0.6324	0.5072	0.7823	0.4312	0.5222
	Std. Error of Mean	0.1859	0.1826	0.09418	0.1844	0.08802	0.1348
	NLR
		Non-Vaccinated		Vaccinated 1st dose		Vaccinated 2nd dose
		COVID 19 (-)	COVID 19 (+)	COVID 19 (-)	COVID 19 (+)	COVID 19 (-)	COVID 19 (+)
	Number of values	16	12	29	18	24	15
	Minimum	0.2765	0.3802	0.9674	0.2514	0.0901	1.184
	25% Percentile	0.8999	0.9377	1.438	1.129	1.714	1.491
	Median	1.405	1.755	1.722	1.3	2.018	1.797
	75% Percentile	2.238	2.661	2.329	1.769	2.242	2.25
	Maximum	2.397	3.302	3.426	2.377	2.934	3.434
	Mean	1.508	1.807	1.922	1.379	1.929	1.915
	Std. Deviation	0.6857	0.9955	0.6806	0.5011	0.598	0.6105
	Std. Error of Mean	0.1714	0.2874	0.1264	0.1181	0.1221	0.1576

## Sheet: TableS4 E.M.B-lymphocytes A. S.
	Effector-memory B-lymphocyte
		No-vaccinated					Vaccinated 1st dose					Vaccinated 2nd dose
		COVID 19(-)		COVID 19(+)			COVID 19(-)		COVID 19(+)			COVID 19(-)		COVID 19(+)
		<30 years	>30 years	<30 years	>30 years		<30 years	>30 years	<30 years	>30 years		<30 years	>30 years	<30 years	>30 years
	Number of values	6	13	7	7		11	20	7	14		10	16	3	12
	Minimum	4.09	2.3	2.7	2.4		3.27	2.17	2.33	3.01		1.21	1.6	2.48	1.79
	25% Percentile	4.48	2.695	3.25	2.98		7.09	3.193	4.08	6.245		2.645	2.8	2.48	4.14
	Median	7.145	3.17	4.15	5		11.1	7.15	6.12	8.09		4.15	4.87	4.37	5.8
	75% Percentile	9.91	3.875	6.22	6.16		14.6	12	6.94	9.888		7.428	8.695	5.71	7.555
	Maximum	13.3	17.7	14.4	10.9		32	39.3	30.8	16.2		20	20.2	5.71	11.5
	Mean	7.512	4.565	5.739	5.336		12.01	9.306	8.874	8.538		5.878	6.638	4.187	6.02
	Std. Deviation	3.376	4.179	4.007	2.808		7.892	8.83	9.794	3.668		5.455	5.321	1.623	2.53
	Std. Error of Mean	1.378	1.159	1.515	1.061		2.38	1.975	3.702	0.9804		1.725	1.33	0.9369	0.7304
	P	0.007		>0.9999			0.1447		0.149			0.6979		0.2945

## Sheet: TableS5 B-lymphocytes
	B-lymphocytes
		Non-Vaccinated		Vaccinated 1st dose		Vaccinated 2nd dose
		COVID 19 (-)	COVID 19 (+)	COVID 19 (-)	COVID 19 (+)	COVID 19 (-)	COVID 19 (+)
	Number of values	19	14	31	20	26	15
	Minimum	9.92	11.2	8.77	6.51	0.74	6.61
	25% Percentile	13.3	15	11.6	10.83	7.865	10.9
	Median	15	16.3	17.4	14.65	12	14.8
	75% Percentile	19.7	17.78	21	21.88	15.85	20.7
	Maximum	29.2	23.9	41.3	29.7	39.3	24.3
	Mean	16.78	16.82	18.04	16.02	13.31	15.13
	Std. Deviation	5.118	3.608	7.454	6.768	8.869	5.6
	Std. Error of Mean	1.174	0.9644	1.339	1.513	1.739	1.446
	Memory B-Lymphocytes
		Non-Vaccinated		Vaccinated 1st dose		Vaccinated 2nd dose
		COVID 19 (-)	COVID 19 (+)	COVID 19 (-)	COVID 19 (+)	COVID 19 (-)	COVID 19 (+)
	Number of values	19	14	31	21	26	15
	Minimum	14.6	10.9	6.49	11	10.9	11.1
	25% Percentile	19.2	20.7	12.7	15.75	14.3	16.4
	Median	29.7	28.65	20.8	20.5	20.8	19.7
	75% Percentile	38.1	33.78	25	35.35	29.53	28.8
	Maximum	64	82.4	46.5	46	49.3	44.8
	Mean	31.58	31.64	21.37	24.31	23.02	22.35
	Std. Deviation	15.5	17.92	9.511	10.64	10.27	9.144
	Std. Error of Mean	3.556	4.79	1.708	2.321	2.013	2.361
	Effector memory B-Lymphocytes
		Non-Vaccinated		Vaccinated 1st dose		Vaccinated 2nd dose
		COVID 19 (-)	COVID 19 (+)	COVID 19 (-)	COVID 19 (+)	COVID 19 (-)	COVID 19 (+)
	Number of values	19	14	31	21	26	15
	Minimum	2.3	2.4	2.17	2.33	1.21	1.79
	25% Percentile	2.94	3.183	3.72	5.21	2.878	3.97
	Median	3.66	4.605	7.97	7.81	4.66	5.69
	75% Percentile	7.74	6.175	13.6	8.935	7.878	7.27
	Maximum	17.7	14.4	39.3	30.8	20.2	11.5
	Mean	5.496	5.537	10.27	8.65	6.346	5.653
	Std. Deviation	4.097	3.331	8.478	6.128	5.276	2.446
	Std. Error of Mean	0.94	0.8902	1.523	1.337	1.035	0.6316
	Memory B-Lymphocytes FcRL4+
		Non-Vaccinated		Vaccinated 1st dose		Vaccinated 2nd dose
		COVID 19 (-)	COVID 19 (+)	COVID 19 (-)	COVID 19 (+)	COVID 19 (-)	COVID 19 (+)
	Number of values	19	14	31	21	26	15
	Minimum	19.6	15.8	13.9	22.5	21.3	24.7
	25% Percentile	36.4	24.63	29	30.7	27.68	26.7
	Median	52.3	48.05	34.7	38.2	33.45	31
	75% Percentile	70.4	65.73	43.1	56.3	41	39.9
	Maximum	87.6	95.1	93.2	98.6	83.9	89.8
	Mean	51.96	47.67	39.55	46.23	37.67	39.77
	Std. Deviation	21.29	26.07	18.37	20.86	14.89	21.7
	Std. Error of Mean	4.884	6.967	3.3	4.553	2.921	5.603
	Effector memory B-Lymphocytes FcRL4+
		Non-Vaccinated		Vaccinated 1st dose		Vaccinated 2nd dose
		COVID 19 (-)	COVID 19 (+)	COVID 19 (-)	COVID 19 (+)	COVID 19 (-)	COVID 19 (+)
	Number of values	19	14	31	21	26	15
	Minimum	2.3	2.7	6.48	8.95	3.13	38.8
	25% Percentile	4.61	4.11	42.3	51.75	57.58	62
	Median	59.4	5.93	49.8	63.6	72.9	75.9
	75% Percentile	76.4	69.6	80	81	83.48	87
	Maximum	90.3	94.1	95.5	92	100	95.8
	Mean	43.3	29.45	56.99	64.29	68.89	72.8
	Std. Deviation	35.7	36.15	23.29	19.71	21.41	16.23
	Std. Error of Mean	8.189	9.663	4.184	4.301	4.198	4.191

## Sheet: TableS6 TFH A.S.
	TFH
		No-vaccinated					Vaccinated 1st dose					Vaccinated 2nd dose
		COVID 19(-)		COVID 19(+)			COVID 19(-)		COVID 19(+)			COVID 19(-)		COVID 19(+)
		<30 years	>30 years	<30 years	>30 years		<30 years	>30 years	<30 years	>30 years		<30 years	>30 years	<30 years	>30 years
	Number of values	6	13	7	7		11	21	7	14		10	16	3	12
	Minimum	9.62	5.82	9.83	5.86		5.02	3.77	5.5	6.14		3.41	3.22	8.58	2.86
	25% Percentile	9.815	10.65	11.9	6.73		10.8	13.3	7.42	9.975		6.173	4.443	8.58	8.335
	Median	14.3	13.3	12.9	9.24		19.7	15.45	12.4	13.4		10.95	7.39	8.74	10.7
	75% Percentile	26.28	16.7	15.4	25.6		26.3	22.1	21.5	23.33		13.5	11.23	9.34	14.33
	Maximum	29.2	21.9	16.6	30		41	28.8	30.7	31.8		15.7	32.1	9.34	20.9
	Mean	17.1	13.6	13.5	15.24		20.62	17.08	14.57	15.83		10.02	9.982	8.887	11.32
	Std. Deviation	8.221	4.251	2.369	9.868		10.96	6.485	8.742	8.259		4.019	8.52	0.4007	4.892
	Std. Error of Mean	3.356	1.179	0.8952	3.73		3.304	1.415	3.304	2.207		1.271	2.13	0.2313	1.412
	P	0.5789		0.7104			0.4163		0.5846			0.2625		0.2835

## Sheet: TableS7 T-Lymphocytes
	T-Lymphocytes
		Non-Vaccinated		Vaccinated 1st dose		Vaccinated 2nd dose
		COVID 19 (-)	COVID 19 (+)	COVID 19 (-)	COVID 19 (+)	COVID 19 (-)	COVID 19 (+)
	Number of values	19	14	32	21	27	14
	Minimum	19.55	19.9	19.2	18.9	9.59	30.2
	25% Percentile	26.2	22.7	32.78	33.75	34.2	37.39
	Median	34.75	32.88	37.2	37.9	41.05	39.63
	75% Percentile	38.6	40.38	43.73	40.4	44.9	45.2
	Maximum	47.7	44.8	65.2	51.2	50.2	59.8
	Mean	32.64	32.51	38.37	36.9	38.15	41.45
	Std. Deviation	7.954	8.451	8.329	7.545	9.729	7.274
	Std. Error of Mean	1.825	2.259	1.472	1.647	1.872	1.944
	Follicular Helper T-Lymphocytes (TFH)
		Non-Vaccinated		Vaccinated 1st dose		Vaccinated 2nd dose
		COVID 19 (-)	COVID 19 (+)	COVID 19 (-)	COVID 19 (+)	COVID 19 (-)	COVID 19 (+)
	Number of values	19	14	32	21	26	15
	Minimum	5.82	5.86	3.77	5.5	3.22	2.86
	25% Percentile	10.1	9.198	13.2	9.55	4.84	8.58
	Median	13.6	12.75	15.8	13.1	8.575	10.5
	75% Percentile	16.8	17.5	24.35	21.9	11.88	12.3
	Maximum	29.2	30	41	31.8	32.1	20.9
	Mean	14.71	14.37	18.3	15.41	9.995	10.83
	Std. Deviation	5.797	6.953	8.293	8.224	7.027	4.454
	Std. Error of Mean	1.33	1.858	1.466	1.795	1.378	1.15
	Memory T-Lymphocytes
		Non-Vaccinated		Vaccinated 1st dose		Vaccinated 2nd dose
		COVID 19 (-)	COVID 19 (+)	COVID 19 (-)	COVID 19 (+)	COVID 19 (-)	COVID 19 (+)
	Number of values	19	14	32	21	26	15
	Minimum	26.3	5.86	33.5	34.2	21.8	38.7
	25% Percentile	44.6	42.75	48.93	45.5	44.08	46.3
	Median	54.6	50.2	57.75	55.5	56.9	58.6
	75% Percentile	64.1	65.23	66.9	71.1	63.53	69.8
	Maximum	65.4	81.6	76.1	79	77.8	83.6
	Mean	52.08	51.83	56.98	56.61	54.24	59.01
	Std. Deviation	11.83	19.25	11.96	13.99	12.98	13
	Std. Error of Mean	2.715	5.144	2.114	3.052	2.546	3.357

## Sheet: TableS8 O.D. Longitudinal
	O.D. according COVID-19 history and vaccine schedule. Longitudinal analysis
		COVID (-)	COVID (+)	COVID (-)	COVID (+)	COVID (-)	COVID (+)
		Pre-Vaccine	Pre-Vaccine	1st Dose	1st Dose	2nd Dose	2nd Dose
	Number of values	17	9	30	20	26	15
	Minimum	0.03821	0.05009	0.2088	0.8286	0.8049	1.032
	25% Percentile	0.07274	0.604	0.4924	1.123	0.9914	1.1
	Median	0.1191	0.8042	0.7916	1.145	1.081	1.276
	75% Percentile	0.2892	1.001	0.9275	1.185	1.29	1.394
	Maximum	0.861	1.103	1.169	1.444	1.386	1.463
	Mean	0.2121	0.7451	0.7147	1.183	1.108	1.26
	Std. Deviation	0.2139	0.3196	0.2812	0.1421	0.1728	0.1457
	Std. Error of Mean	0.05188	0.1065	0.05133	0.03177	0.03388	0.03762

## Sheet: TableS9TLC,ANC,NLR Longitudinal
	Neutrophils. Longitudinal analysis
		COVID (-)	COVID (+)	COVID (-)	COVID (+)	COVID (-)	COVID (+)
		Pre-Vaccine	Pre-Vaccine	1st Dose	1st Dose	2nd Dose	2nd Dose
	Number of values	13	6	24	16	20	12
	Minimum	0.99	2.85	1.61	0.87	1.551	2.34
	25% Percentile	2.664	3.188	2.885	2.66	2.938	2.55
	Median	3.4	3.615	3.8	3.1	3.745	3.364
	75% Percentile	4.37	4.693	4.643	3.45	4.35	4.382
	Maximum	5.87	5.75	7.242	5.264	5.888	5.46
	Mean	3.462	3.912	3.893	3.05	3.675	3.576
	Std. Deviation	1.302	1.043	1.505	1.021	1.108	1.093
	Std. Error of Mean	0.3611	0.4258	0.3073	0.2554	0.2478	0.3156
	Lymphocytes. Longitudinal analysis
		COVID (-)	COVID (+)	COVID (-)	COVID (+)	COVID (-)	COVID (+)
		Pre-Vaccine	Pre-Vaccine	1st Dose	1st Dose	2nd Dose	2nd Dose
	Number of values	12	6	23	16	19	12
	Minimum	1.6	1.05	0.92	1.46	1.18	1.04
	25% Percentile	2.004	1.485	1.81	1.845	1.57	1.6
	Median	2.47	2.04	2.15	2.22	1.71	1.72
	75% Percentile	3.556	2.335	2.44	2.528	2.07	2.428
	Maximum	3.792	2.41	3.26	4.816	2.838	2.816
	Mean	2.699	1.913	2.061	2.363	1.855	1.915
	Std. Deviation	0.7978	0.5248	0.5285	0.8213	0.42	0.514
	Std. Error of Mean	0.2303	0.2142	0.1102	0.2053	0.09635	0.1484
	NLR. Longitudinal analysis
		COVID (-)	COVID (+)	COVID (-)	COVID (+)	COVID (-)	COVID (+)
		Pre-Vaccine	Pre-Vaccine	1st Dose	1st Dose	2nd Dose	2nd Dose
	Number of values	12	6	24	16	19	12
	Minimum	0.2765	1.447	0.9948	0.2514	0.9565	1.184
	25% Percentile	0.8717	1.585	1.472	1.141	1.686	1.444
	Median	1.101	1.952	1.682	1.3	1.983	1.783
	75% Percentile	2.238	2.834	2.401	1.709	2.254	2.396
	Maximum	2.357	3.194	3.426	2.377	2.934	3.434
	Mean	1.394	2.148	1.934	1.383	1.973	1.95
	Std. Deviation	0.7159	0.6726	0.689	0.5111	0.4895	0.6741
	Std. Error of Mean	0.2067	0.2746	0.1406	0.1278	0.1123	0.1946

## Sheet: TableS10B-lymphocytesLongitudin
	B-Lymphocytes. Longitudinal analysis
		COVID (-)	COVID (+)	COVID (-)	COVID (+)	COVID (-)	COVID (+)
		Pre-Vaccine	Pre-Vaccine	1st Dose	1st Dose	2nd Dose	2nd Dose
	Number of values	15	8	27	18	24	14
	Minimum	9.92	13.4	8.77	6.51	0.74	6.61
	25% Percentile	13.6	14.8	11.6	10.88	7.475	10.67
	Median	15	15.8	17.4	14.65	11.9	13.65
	75% Percentile	20.6	20.28	21	22.43	15.23	20.1
	Maximum	29.2	23.1	31.6	29.7	29.4	24.3
	Mean	17.67	16.98	17.53	16.35	11.67	14.73
	Std. Deviation	5.356	3.466	6.301	6.826	6.729	5.587
	Std. Error of Mean	1.383	1.225	1.213	1.609	1.373	1.493
	Memory B-Lymphocytes. Longitudinal analysis
		COVID (-)	COVID (+)	COVID (-)	COVID (+)	COVID (-)	COVID (+)
		Pre-Vaccine	Pre-Vaccine	1st Dose	1st Dose	2nd Dose	2nd Dose
	Number of values	16	9	27	19	24	14
	Minimum	14.6	10.9	6.49	11	12.4	11.1
	25% Percentile	19.85	19.65	12.7	15.1	14.6	16.1
	Median	30.4	28.4	20.8	19.6	23.85	19.95
	75% Percentile	37.6	46.8	25.4	27.9	30.18	29.35
	Maximum	64	82.4	46.5	46	49.3	44.8
	Mean	31.61	34.34	21.81	23.08	23.9	22.61
	Std. Deviation	14.74	22.01	9.991	10.44	10.19	9.435
	Std. Error of Mean	3.684	7.335	1.923	2.396	2.08	2.521
	Effector memory B-Lymphocytes. Longitudinal analysis
		COVID (-)	COVID (+)	COVID (-)	COVID (+)	COVID (-)	COVID (+)
		Pre-Vaccine	Pre-Vaccine	1st Dose	1st Dose	2nd Dose	2nd Dose
	Number of values	15	9	27	19	24	14
	Minimum	2.3	2.4	2.17	2.33	1.21	1.79
	25% Percentile	2.81	2.975	3.72	4.82	2.753	3.858
	Median	3.28	5.7	7.97	6.94	4.66	5.495
	75% Percentile	6.29	8.56	13.6	8.92	7.57	6.918
	Maximum	17.7	14.4	39.3	16.2	20.2	8.19
	Mean	4.979	6.216	10.17	7.526	6.098	5.236
	Std. Deviation	4.048	4.015	8.664	3.619	5.109	1.904
	Std. Error of Mean	1.045	1.338	1.667	0.8301	1.043	0.5089
	Memory B-Lymphocytes FcRL4+. Longitudinal analysis
		COVID (-)	COVID (+)	COVID (-)	COVID (+)	COVID (-)	COVID (+)
		Pre-Vaccine	Pre-Vaccine	1st Dose	1st Dose	2nd Dose	2nd Dose
	Number of values	15	9	27	19	24	14
	Minimum	19.6	25.6	13.9	22.5	21.3	24.7
	25% Percentile	33.6	36.7	29	29.4	27.23	27
	Median	54.5	63.9	34.7	37.5	33.35	31.1
	75% Percentile	70.4	77.25	38.6	49.2	41.2	43.8
	Maximum	87.6	95.1	93.2	98.6	83.9	89.8
	Mean	51.94	59.53	39.12	45.17	37.58	40.8
	Std. Deviation	21.92	23.81	18.55	21.62	15.52	22.14
	Std. Error of Mean	5.66	7.938	3.569	4.96	3.169	5.917
	Effector memory B-Lymphocytes FcRL4+. Longitudinal analysis
		COVID (-)	COVID (+)	COVID (-)	COVID (+)	COVID (-)	COVID (+)
		Pre-Vaccine	Pre-Vaccine	1st Dose	1st Dose	2nd Dose	2nd Dose
	Number of values	15	9	27	19	24	14
	Minimum	2.3	2.7	6.48	8.95	33.3	52.4
	25% Percentile	6.29	4.475	43.3	51.4	60.98	65.53
	Median	65.1	6.22	55	72.1	73.25	76.4
	75% Percentile	76.4	79.05	80	82.8	85.03	87.1
	Maximum	90.3	94.1	95.5	92	100	95.8
	Mean	44.69	35.58	59.38	65.52	72.73	75.23
	Std. Deviation	35.8	39.14	23.87	20.37	16.27	13.73
	Std. Error of Mean	9.243	13.05	4.595	4.672	3.321	3.669

[truncated: 1 more sheets: TableS11T-Lymphcytes Longitudin]
